# Supplementary material for: High Prevalence of Multiple Antibiotic-Resistant, Extended-Spectrum β-Lactamase (ESBL)-Producing Escherichia coli in Fresh Seafood Sold in Retail Markets of Mumbai, India
Source: PubMed Central journal article supplement (PMC7356741; doi:10.3390/vetsci7020046), 2020-04-16
Supplement: vetsci-07-00046-s001.pdf [file vetsci-07-00046-s001.pdf]

**Table S1.** Oligonucleotide primers used in this study for the detection of antibiotic resistance genes.

| Sl. No. | Primer name        | Target genes              | Primer sequences (5'-3')                             | Product size (bp) | References |
|---------|--------------------|---------------------------|------------------------------------------------------|-------------------|------------|
| 1.      | TEM-F<br>TEM-R     | <i>bla</i> <sub>TEM</sub> | AAAATTCTTGAAGACG<br>TTACCAATGCTTAATCA                | 1080              | [29]       |
| 2.      | SHV-F<br>SHV-R     | <i>bla</i> <sub>SHV</sub> | TTAACTCCCTGTTAGCCA<br>GATTGCTGATTCGCCC               | 786               | [29]       |
| 3.      | CTX-F<br>CTX-R     | <i>bla</i> <sub>CTX</sub> | CGATATCGTTGGTGCCATA<br>TTTGCGATGTGCAGTACCAGTAA       | 544               | [28]       |
| 4.      | NDM-F1<br>NDM-R1   | <i>bla</i> <sub>NDM</sub> | ATGGAATTGCCCAATATTATGCAC<br>TCA GCG CAG CTT GTC GGC' | 815               | [30]       |
| 5.      | NDM-F2<br>NDM-R2   | <i>bla</i> <sub>NDM</sub> | GGG CAGTCG CTT CCAACGGT<br>GTA GTG CTC AGT GTCGCAT   | 475               | [31]       |
| 6.      | OXA -1A<br>OXA -1R | <i>bla</i> <sub>OXA</sub> | CCAAAGACGTGGATG<br>GTTAAATTCGACCCCAAGTT'             | 540               | [32]       |
| 7.      | VIM-F<br>VIM-R     | <i>bla</i> <sub>VIM</sub> | GATGGTGTTTGGTCGCATA<br>CGAATGCGCAGCACCAG             | 390               | [33]       |
